# Supplementary material for: Substituted Aryl Benzylamines as Potent and Selective Inhibitors of 17β-Hydroxysteroid Dehydrogenase Type 3
Source: MDPI journal article supplement (doi:10.3390/molecules26237166), 2021-11-26
Supplement: s1 [file s1]

## SUPPLEMENTARY INFORMATION

### Substituted Aryl Benzylamines as Potent and Selective Inhibitors of 17 $\beta$ -Hydroxysteroid Dehydrogenase Type 3

Nigel Vicker<sup>1,†</sup>, Helen V. Bailey<sup>1,†</sup>, Joanna M. Day<sup>2</sup>, Mary F. Mahon<sup>3</sup>, Andrew Smith<sup>1</sup>, Helena J. Tutill<sup>2</sup>, Atul Purohit<sup>2</sup> and Barry V. L. Potter<sup>1,4,\*</sup>

<sup>1</sup> Medicinal Chemistry, Department of Pharmacy and Pharmacology and Sterix Ltd, University of Bath, Claverton Down, Bath BA2 7AY, UK

<sup>2</sup> Oncology Drug Discovery & Women's Health Group, Department of Endocrinology & Metabolic Medicine & Sterix Ltd., Imperial College London, London W2 1NY, UK

<sup>3</sup> Department of Chemistry, University of Bath, Claverton Down, Bath BA2 7AY, UK

<sup>4</sup> Medicinal Chemistry & Drug Discovery, Department of Pharmacology, University of Oxford, Mansfield Road, Oxford, OX1 3QT, UK.

\* Correspondence: [barry.potter@pharm.ox.ac.uk](mailto:barry.potter@pharm.ox.ac.uk)

† Equal contribution.

**Section S1.** Inhibition of 17 $\beta$ -HSD Type 3 activity by compound **1**, (IC<sub>50</sub> = 0.9  $\mu$ M)

**Section S2.** Chiral separation of compounds **31** and **32**.

**Section S3.** X-ray data for compound **31**.

**Section S1.** Inhibition of 17 $\beta$ -HSD Type 3 activity by compound **1**, ( $IC_{50}$  = 0.9  $\mu$ M)

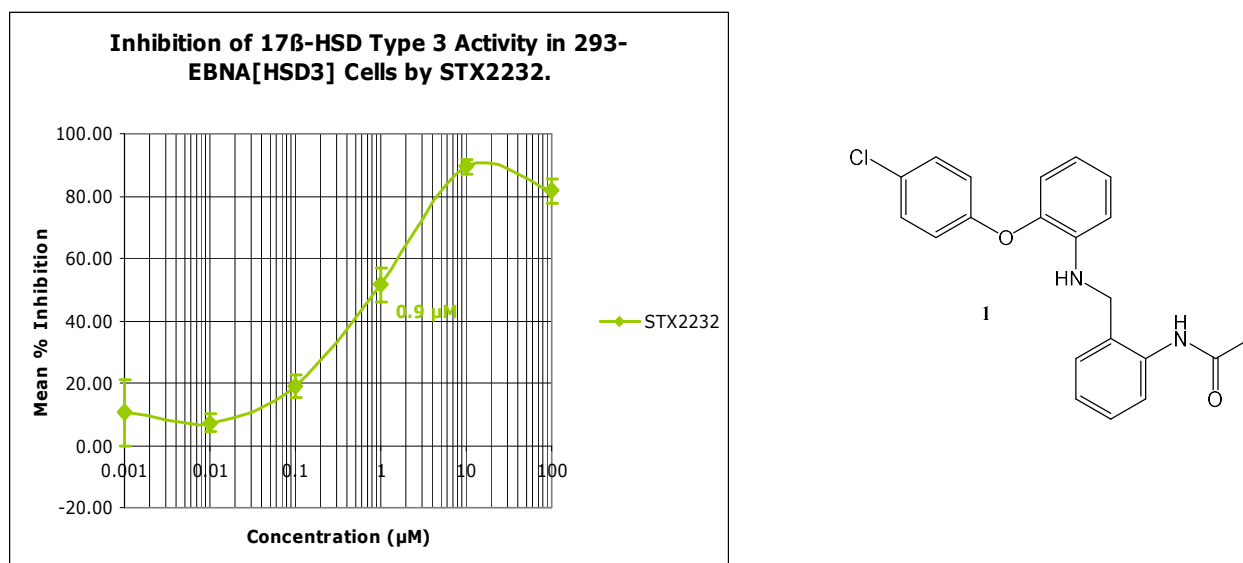

Figure S1. Inhibition of 17 $\beta$ -HSD Type 3 activity by compound **1**, ( $IC_{50}$  = 0.9  $\mu$ M)

**Section S2.** Chiral separation of racemic **26** to give enantiomers **31** and **32**.

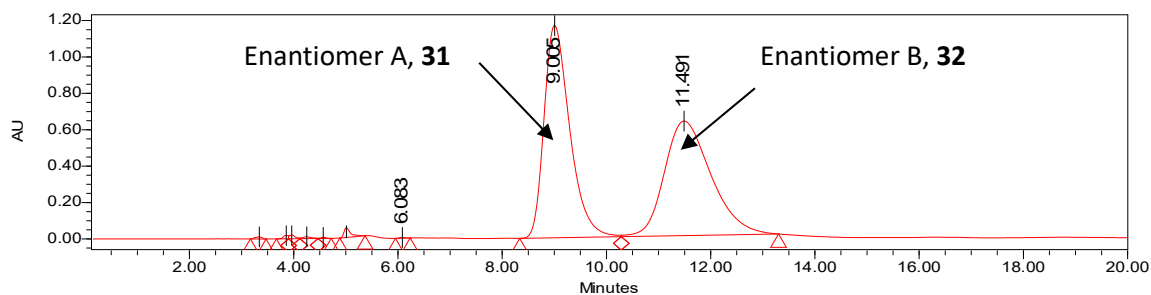

Figure S2. Chiral Separation of compound **26** to give enantiomers **31** and **32** using a Chiralcel AD-H chiral HPLC Column (80 % methanol and 20 % water at 1.0 mL/min).

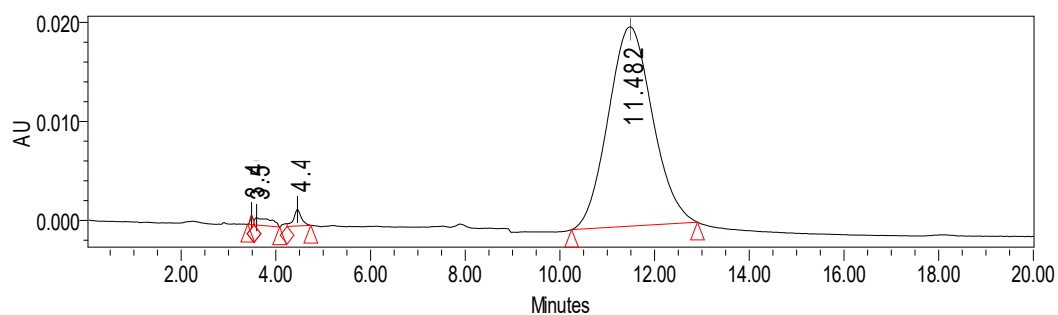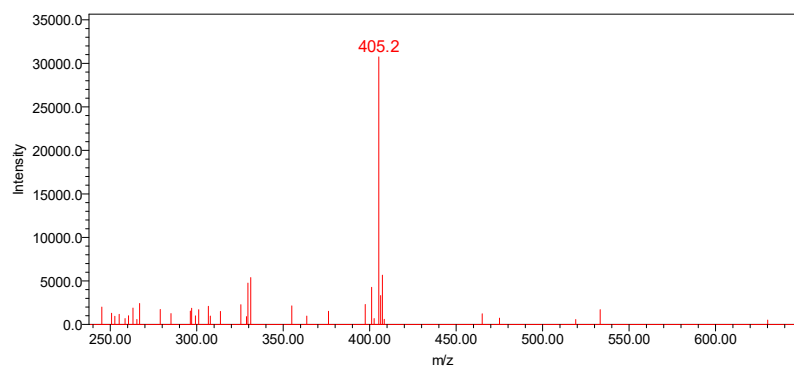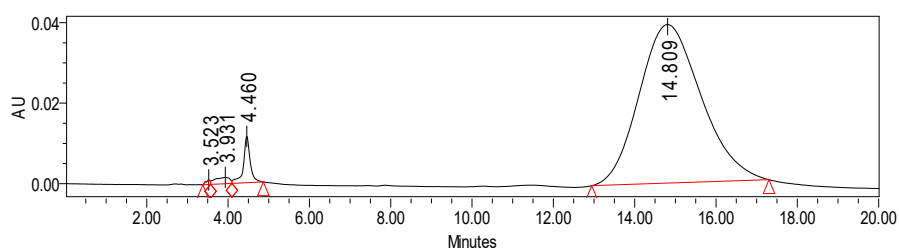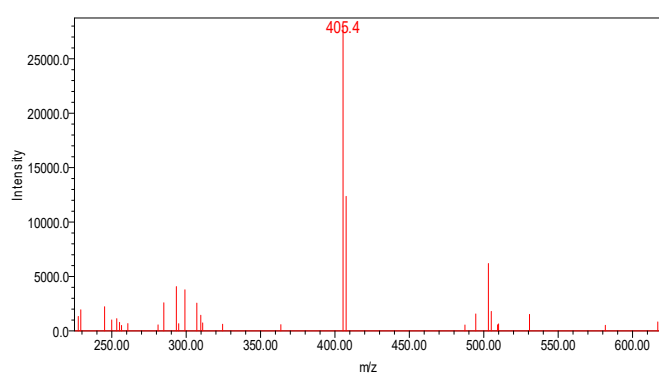

Figure S3. LCMS traces of Enantiomer A (**31**) and Enantiomer B (**32**) from the chiral separation the racemic compound **26** using a preparative Chiralcel AD-H chiral column (80 % methanol, 20 % water at 1.2 mL/min).

### Section S3. X-ray data for compound **31**.

Table S1: Crystal data and structure refinement for k07farm3, compound **31**.

|                                             |                                                                 |
|---------------------------------------------|-----------------------------------------------------------------|
| Identification code                         | k07farm3                                                        |
| Empirical formula                           | C <sub>24</sub> H <sub>23</sub> ClN <sub>2</sub> O <sub>2</sub> |
| Formula weight                              | 406.89                                                          |
| Temperature/K                               | 150.15                                                          |
| Crystal system                              | orthorhombic                                                    |
| Space group                                 | P2 <sub>1</sub> 2 <sub>1</sub> 2 <sub>1</sub>                   |
| a/Å                                         | 8.9500(1)                                                       |
| b/Å                                         | 10.4450(1)                                                      |
| c/Å                                         | 22.6800(2)                                                      |
| $\alpha$ /°                                 | 90                                                              |
| $\beta$ /°                                  | 90                                                              |
| $\gamma$ /°                                 | 90                                                              |
| Volume/Å <sup>3</sup>                       | 2120.19(4)                                                      |
| Z                                           | 4                                                               |
| $\rho_{\text{calc}}$ /cm <sup>3</sup>       | 1.275                                                           |
| $\mu$ /mm <sup>-1</sup>                     | 0.202                                                           |
| F(000)                                      | 856.0                                                           |
| Crystal size/mm <sup>3</sup>                | 0.35 × 0.25 × 0.25                                              |
| Radiation                                   | MoK $\alpha$ ( $\lambda$ = 0.71073)                             |
| 2 $\theta$ range for data collection/°      | 7.056 to 60.074                                                 |
| Index ranges                                | -12 ≤ h ≤ 12, -14 ≤ k ≤ 14, -31 ≤ l ≤ 30                        |
| Reflections collected                       | 42345                                                           |
| Independent reflections                     | 6200 [ $R_{\text{int}}$ = 0.0403, $R_{\text{sigma}}$ = 0.0264]  |
| Data/restraints/parameters                  | 6200/2/272                                                      |
| Goodness-of-fit on F <sup>2</sup>           | 1.040                                                           |
| Final R indexes [ $I \geq 2\sigma(I)$ ]     | $R_1$ = 0.0329, $wR_2$ = 0.0764                                 |
| Final R indexes [all data]                  | $R_1$ = 0.0388, $wR_2$ = 0.0796                                 |
| Largest diff. peak/hole / e Å <sup>-3</sup> | 0.20/-0.21                                                      |
| Flack parameter                             | 0.000(13)                                                       |

**Crystal Data** for C<sub>24</sub>H<sub>23</sub>ClN<sub>2</sub>O<sub>2</sub> ( $A_r$  = 406.89): orthorhombic, space group *P*2<sub>1</sub>2<sub>1</sub>2<sub>1</sub> (no. 19),  $a$  = 8.9500(1) Å,  $b$  = 10.4450(1) Å,  $c$  = 22.6800(2) Å,  $U$  = 2120.19(4) Å<sup>3</sup>,  $Z$  = 4,  $T$  = 150 K,  $\mu$ (MoK $\alpha$ ) = 0.202 mm<sup>-1</sup>,  $D_{\text{calc}}$  = 1.275 g cm<sup>-3</sup>, 42345 reflections measured (7.056° ≤ 2 $\theta$  ≤ 60.074°), 6200 unique ( $R_{\text{int}}$  = 0.0403) which were used in all calculations. The final  $R_1$  was 0.0329 ( $I \geq 2\sigma(I)$ ) and  $wR_2$  was 0.0796 (all data).

H1A and H2 (attached to N1 and N2, respectively, in the structure of **k07farm3**, were located and refined at a distance of 0.9 Å from the parent nitrogen atoms. The gross structure is dominated by 1-dimensional, hydrogen-bonded polymers which propagate along the  $a$ -axis.

Table S2: Fractional Atomic Coordinates ( $\times 10^4$ ) and Equivalent Isotropic Displacement Parameters ( $\text{\AA}^2 \times 10^3$ ) for k07farm3.  $U_{eq}$  is defined as 1/3 of of the trace of the orthogonalised  $U_{ij}$  tensor.

| Atom | x           | y          | z          | U(eq)     |
|------|-------------|------------|------------|-----------|
| C11  | 13382.8(5)  | 5596.5(5)  | 6077.3(2)  | 40.78(13) |
| O1   | 7750.0(14)  | 4512.2(12) | 7316.4(5)  | 31.3(3)   |
| O2   | 7183.1(13)  | 7843.6(12) | 10379.9(6) | 34.4(3)   |
| N1   | 8651.4(16)  | 4859.8(13) | 8464.9(6)  | 25.5(3)   |
| N2   | 9268.8(15)  | 6827.1(13) | 10065.9(6) | 24.7(3)   |
| C1   | 9448.2(18)  | 5227.0(14) | 9001.4(7)  | 24.3(3)   |
| C2   | 10980.1(19) | 4564.5(15) | 8993.4(7)  | 27.5(3)   |
| C3   | 11963.0(19) | 4982.8(17) | 8494.9(8)  | 31.9(4)   |
| C4   | 12551(2)    | 4214(2)    | 8098.7(10) | 46.0(5)   |
| C5   | 8614.9(19)  | 4829.2(15) | 9555.5(7)  | 26.3(3)   |
| C6   | 7902(2)     | 3644.8(18) | 9573.5(8)  | 37.9(4)   |
| C7   | 7206(3)     | 3208.2(18) | 10080.4(9) | 44.3(5)   |
| C8   | 7245(3)     | 3947.0(18) | 10589.3(8) | 38.4(4)   |
| C9   | 7942(2)     | 5123.3(17) | 10583.1(7) | 29.8(3)   |
| C10  | 8614.8(17)  | 5579.4(15) | 10067.4(7) | 24.5(3)   |
| C11  | 8502.2(18)  | 7886.2(15) | 10219.5(7) | 25.0(3)   |
| C12  | 9337.5(19)  | 9135.6(16) | 10186.8(8) | 28.8(3)   |
| C13  | 7475.1(17)  | 5593.9(15) | 8248.0(7)  | 25.0(3)   |
| C14  | 6683(2)     | 6477.9(16) | 8587.6(8)  | 29.4(3)   |
| C15  | 5513(2)     | 7185.3(18) | 8344.4(9)  | 35.4(4)   |
| C16  | 5100(2)     | 7017(2)    | 7760.1(10) | 40.2(4)   |
| C17  | 5869(2)     | 6131.8(19) | 7417.4(9)  | 36.4(4)   |
| C18  | 7028.8(19)  | 5443.8(16) | 7659.6(7)  | 27.4(3)   |
| C19  | 9074.7(19)  | 4848.5(16) | 7041.5(7)  | 26.2(3)   |
| C20  | 9785(2)     | 6019.5(16) | 7114.5(7)  | 28.4(3)   |
| C21  | 11124(2)    | 6255.6(17) | 6817.7(8)  | 30.3(3)   |
| C22  | 11713(2)    | 5320.8(17) | 6455.7(7)  | 31.0(4)   |
| C23  | 11008(2)    | 4153.6(17) | 6382.9(8)  | 34.1(4)   |
| C24  | 9683(2)     | 3912.9(17) | 6679.8(8)  | 32.6(4)   |

Table S3: Anisotropic Displacement Parameters ( $\text{\AA}^2 \times 10^3$ ) for k07farm3. The Anisotropic displacement factor exponent takes the form:  $-2\pi^2[h^2a^{*2}U_{11}+2hka^*b^*U_{12}+\dots]$ .

| Atom | U <sub>11</sub> | U <sub>22</sub> | U <sub>33</sub> | U <sub>23</sub> | U <sub>13</sub> | U <sub>12</sub> |
|------|-----------------|-----------------|-----------------|-----------------|-----------------|-----------------|
| C11  | 32.8(2)         | 51.5(3)         | 38.1(2)         | 6.6(2)          | 5.33(18)        | 7.7(2)          |
| O1   | 36.5(6)         | 30.2(6)         | 27.2(6)         | -4.3(5)         | 2.1(5)          | -7.5(5)         |
| O2   | 20.7(5)         | 34.6(6)         | 47.9(8)         | -7.4(6)         | 1.2(5)          | 1.4(5)          |

|     |          |          |          |         |          |          |
|-----|----------|----------|----------|---------|----------|----------|
| N1  | 29.2(7)  | 25.9(6)  | 21.5(6)  | -1.8(5) | 1.5(5)   | 1.9(5)   |
| N2  | 20.6(6)  | 27.6(6)  | 26.0(6)  | -4.1(5) | 1.0(5)   | -0.3(5)  |
| C1  | 30.6(7)  | 22.1(7)  | 20.4(7)  | 0.0(6)  | 0.8(6)   | -1.5(6)  |
| C2  | 30.8(7)  | 25.1(7)  | 26.8(7)  | 1.9(6)  | -1.5(6)  | 1.2(6)   |
| C3  | 29.3(8)  | 30.2(8)  | 36.2(9)  | 2.1(7)  | 2.1(7)   | 0.3(7)   |
| C4  | 45.6(11) | 44.3(11) | 48.2(11) | -4.0(9) | 15.5(9)  | -0.4(9)  |
| C5  | 32.8(8)  | 24.3(7)  | 21.9(7)  | 1.4(6)  | 1.7(6)   | -1.1(6)  |
| C6  | 59.6(12) | 27.0(8)  | 27.2(8)  | -2.2(7) | 8.8(8)   | -9.1(8)  |
| C7  | 69.0(14) | 30.4(9)  | 33.3(9)  | 1.4(7)  | 13.7(10) | -14.3(9) |
| C8  | 53.4(12) | 35.6(9)  | 26.3(8)  | 4.6(7)  | 9.6(8)   | -4.4(8)  |
| C9  | 32.8(8)  | 34.1(8)  | 22.6(7)  | -1.0(6) | 1.1(6)   | 1.7(7)   |
| C10 | 23.9(7)  | 25.8(7)  | 23.7(7)  | -0.1(6) | -0.5(5)  | 0.8(6)   |
| C11 | 22.5(7)  | 28.8(8)  | 23.8(7)  | -3.4(6) | -4.1(6)  | 1.6(6)   |
| C12 | 26.6(7)  | 28.3(8)  | 31.6(8)  | -2.8(6) | -1.4(7)  | -0.1(6)  |
| C13 | 25.4(7)  | 23.7(7)  | 26.0(7)  | 2.9(6)  | 2.0(6)   | -4.2(6)  |
| C14 | 28.9(8)  | 29.2(8)  | 30.2(8)  | 0.2(6)  | 5.6(7)   | -2.5(7)  |
| C15 | 29.0(9)  | 31.4(8)  | 45.9(10) | 2.8(8)  | 8.2(8)   | 1.9(7)   |
| C16 | 27.2(8)  | 40.9(10) | 52.5(12) | 11.0(9) | -2.5(8)  | 1.5(8)   |
| C17 | 32.8(9)  | 41.7(10) | 34.8(9)  | 6.4(8)  | -6.7(8)  | -6.0(8)  |
| C18 | 28.3(7)  | 27.1(8)  | 26.6(7)  | 0.8(6)  | 1.2(6)   | -5.3(6)  |
| C19 | 31.4(8)  | 28.6(8)  | 18.6(7)  | 1.0(6)  | -2.9(6)  | -0.4(6)  |
| C20 | 34.4(8)  | 27.1(8)  | 23.7(7)  | -1.9(6) | -0.3(6)  | -0.2(6)  |
| C21 | 34.5(8)  | 28.6(8)  | 27.8(8)  | 1.4(7)  | -1.3(7)  | -0.5(7)  |
| C22 | 29.4(8)  | 37.6(9)  | 26.0(7)  | 5.6(7)  | 0.1(6)   | 6.6(7)   |
| C23 | 41.1(9)  | 30.7(9)  | 30.4(8)  | -2.8(7) | -0.7(7)  | 8.5(7)   |
| C24 | 41.5(9)  | 27.0(8)  | 29.3(8)  | -2.3(6) | -4.3(7)  | 0.5(7)   |

Table S4: Bond Lengths for k07farm3.

| Atom | Atom | Length/Å   | Atom | Atom | Length/Å |
|------|------|------------|------|------|----------|
| C11  | C22  | 1.7474(18) | C8   | C9   | 1.378(3) |
| O1   | C18  | 1.403(2)   | C9   | C10  | 1.399(2) |
| O1   | C19  | 1.385(2)   | C11  | C12  | 1.506(2) |
| O2   | C11  | 1.236(2)   | C13  | C14  | 1.396(2) |
| N1   | C1   | 1.462(2)   | C13  | C18  | 1.402(2) |
| N1   | C13  | 1.392(2)   | C14  | C15  | 1.395(3) |
| N2   | C10  | 1.429(2)   | C15  | C16  | 1.387(3) |
| N2   | C11  | 1.348(2)   | C16  | C17  | 1.390(3) |
| C1   | C2   | 1.536(2)   | C17  | C18  | 1.377(2) |
| C1   | C5   | 1.519(2)   | C19  | C20  | 1.388(2) |

|    |     |          |     |     |          |
|----|-----|----------|-----|-----|----------|
| C2 | C3  | 1.498(2) | C19 | C24 | 1.387(2) |
| C3 | C4  | 1.315(3) | C20 | C21 | 1.397(2) |
| C5 | C6  | 1.392(2) | C21 | C22 | 1.380(2) |
| C5 | C10 | 1.401(2) | C22 | C23 | 1.383(3) |
| C6 | C7  | 1.385(3) | C23 | C24 | 1.386(3) |
| C7 | C8  | 1.389(3) |     |     |          |

Table S5: Bond Angles for k07farm3.

| Atom | Atom | Atom | Angle/°    | Atom | Atom | Atom | Angle/°    |
|------|------|------|------------|------|------|------|------------|
| C19  | O1   | C18  | 117.88(12) | N1   | C13  | C14  | 123.61(15) |
| C13  | N1   | C1   | 121.24(13) | N1   | C13  | C18  | 119.36(15) |
| C11  | N2   | C10  | 122.65(13) | C14  | C13  | C18  | 117.03(15) |
| N1   | C1   | C2   | 107.91(12) | C15  | C14  | C13  | 120.90(17) |
| N1   | C1   | C5   | 112.18(13) | C16  | C15  | C14  | 120.71(17) |
| C5   | C1   | C2   | 108.95(13) | C15  | C16  | C17  | 119.11(17) |
| C3   | C2   | C1   | 113.69(13) | C18  | C17  | C16  | 119.83(18) |
| C4   | C3   | C2   | 124.94(18) | C13  | C18  | O1   | 118.33(14) |
| C6   | C5   | C1   | 119.47(14) | C17  | C18  | O1   | 119.17(15) |
| C6   | C5   | C10  | 118.21(15) | C17  | C18  | C13  | 122.43(16) |
| C10  | C5   | C1   | 122.18(14) | O1   | C19  | C20  | 124.18(15) |
| C7   | C6   | C5   | 121.54(17) | O1   | C19  | C24  | 115.05(15) |
| C6   | C7   | C8   | 119.69(18) | C24  | C19  | C20  | 120.76(16) |
| C9   | C8   | C7   | 119.91(17) | C19  | C20  | C21  | 119.41(16) |
| C8   | C9   | C10  | 120.46(16) | C22  | C21  | C20  | 119.29(17) |
| C5   | C10  | N2   | 120.55(14) | C21  | C22  | Cl1  | 120.13(15) |
| C9   | C10  | N2   | 119.27(14) | C21  | C22  | C23  | 121.37(17) |
| C9   | C10  | C5   | 120.16(15) | C23  | C22  | Cl1  | 118.50(14) |
| O2   | C11  | N2   | 122.20(15) | C22  | C23  | C24  | 119.49(16) |
| O2   | C11  | C12  | 121.33(15) | C23  | C24  | C19  | 119.67(17) |
| N2   | C11  | C12  | 116.48(14) |      |      |      |            |

Table S6: Hydrogen Bonds for k07farm3.

| D  | H  | A               | d(D-H)/Å | d(H-A)/Å | d(D-A)/Å   | D-H-A/° |
|----|----|-----------------|----------|----------|------------|---------|
| N2 | H2 | O2 <sup>1</sup> | 0.898(7) | 1.921(7) | 2.8185(18) | 178(2)  |

<sup>1</sup>1/2+X,3/2-Y,2-Z

Table S7: Hydrogen Atom Coordinates ( $\text{\AA} \times 10^4$ ) and Isotropic Displacement Parameters ( $\text{\AA}^2 \times 10^3$ ) for k07farm3.

| Atom | <i>x</i>  | <i>y</i> | <i>z</i> | U(eq) |
|------|-----------|----------|----------|-------|
| H1   | 9250(20)  | 4560(20) | 8180(7)  | 37(5) |
| H2   | 10206(12) | 6910(20) | 9930(9)  | 38(6) |
| H1A  | 9595      | 6176     | 9004     | 29    |
| H2A  | 11497     | 4743     | 9370     | 33    |
| H2B  | 10827     | 3628     | 8966     | 33    |
| H3   | 12178     | 5871     | 8462     | 38    |
| H4A  | 12361     | 3320     | 8116     | 55    |
| H4B  | 13165     | 4553     | 7795     | 55    |
| H6   | 7893      | 3124     | 9230     | 46    |
| H7   | 6703      | 2407     | 10080    | 53    |
| H8   | 6793      | 3642     | 10941    | 46    |
| H9   | 7967      | 5628     | 10931    | 36    |
| H12A | 8788      | 9735     | 9935     | 43    |
| H12B | 10333     | 8987     | 10020    | 43    |
| H12C | 9435      | 9498     | 10584    | 43    |
| H14  | 6943      | 6599     | 8990     | 35    |
| H15  | 4993      | 7788     | 8582     | 43    |
| H16  | 4303      | 7501     | 7596     | 48    |
| H17  | 5595      | 6002     | 7017     | 44    |
| H20  | 9364      | 6654     | 7364     | 34    |
| H21  | 11625     | 7051     | 6865     | 36    |
| H23  | 11427     | 3522     | 6131     | 41    |
| H24  | 9194      | 3111     | 6636     | 39    |

Crystal structure determination of [k07farm3]

Refinement model description. Number of restraints - 2, number of constraints - unknown.  
Details:

1. Fixed Uiso  
At 1.2 times of:  
All C(H) groups, All C(H,H) groups  
At 1.5 times of:  
All C(H,H,H) groups
2. Restrained distances  
H1-N1 = H2-N2  
0.9 with sigma of 0.005
- 3.a Ternary CH refined with riding coordinates:  
C1(H1A)
- 3.b Secondary CH2 refined with riding coordinates:  
C2(H2A,H2B)
- 3.c Aromatic/amide H refined with riding coordinates:  
C3(H3), C6(H6), C7(H7), C8(H8), C9(H9), C14(H14), C15(H15), C16(H16),  
C17(H17), C20(H20), C21(H21), C23(H23), C24(H24)



3.d X=CH2 refined with riding coordinates:  
C4 (H4A,H4B)  
3.e Idealised Me refined as rotating group:  
C12 (H12A,H12B,H12C)

This report has been created with Olex2, compiled on 2018.05.29 svn.r3508 for OlexSys.

Crystallographic data for **31** been deposited with the Cambridge Crystallographic Data Centre as supplementary publication CCDC 2088971. A copy of these data can be obtained free of charge on application to CCDC, 12 Union Road, Cambridge CB2 1EZ, UK [fax (+44) 1223 336033, e-mail: [deposit@ccdc.cam.ac.uk.2088971](mailto:deposit@ccdc.cam.ac.uk.2088971)].
